# Supplementary material for: Syzydyerin A, a new unusual C-methylated chalcone isolated from the leaves of Syzygium dyerianum (King) Chantar. & J.Parn
Source: publisher site journal article supplement (doi:10.1515/znc-2025-0179), 2025-12-08
Supplement: Supplementary file 1 [file j_znc-2025-0179_suppl_001.docx]

SUPPLEMENTARY MATERIAL

Syzydyerin A, a new unusual C-methylated chalcone from the leaves of *Syzygium dyerianum* (King) Chantar. & J.Parn.

**Faezatul Alwani Mohd Rahima, Wan Mohd Nuzul Hakimi Wan Salleha,*,**

**Nurunajah Ab Ghanib,c, Abubakar Siddiq Salihua,d, Mohd Hafiz Arzmie,**

**David Barkerf,g**

a Department of Chemistry, Faculty of Science and Mathematics, Universiti Pendidikan Sultan Idris, 35900 Tanjong Malim, Perak, Malaysia

b Atta-ur-Rahman Institute for Natural Product Discovery (AuRIns), Universiti Teknologi MARA, Puncak Alam Campus, 42300 Puncak Alam, Selangor, Malaysia

Faculty of Applied Sciences, Universiti Teknologi MARA, Shah Alam, Selangor, Malaysia

d Department of Pure and Industrial Chemistry, Faculty of Natural and Applied Science, Umaru Musa Yar'adua University, Katsina, Nigeria

eDepartment of Fundamental Dental and Medical Sciences, Kulliyyah of Dentistry, International Islamic University Malaysia, IIUM Kuantan Campus, Pahang, Malaysia

fSchool of Chemical Sciences, University of Auckland, Auckland, 1010, New Zealand

gThe MacDiarmid Institute for Advanced Materials and Nanotechnology, Wellington, 6012, New Zealand

* Corresponding author: [wmnhakimi@fsmt.upsi.edu.my](mailto:wmnhakimi@fsmt.upsi.edu.my)

**Figure S1**. HR-ESI-MS spectrum of compound **1**

**Figure S2.** IR spectrum of compound **1**

**Figure S3.** 1H NMR spectrum (CDCl3, 500 MHz) of compound **1**

**Figure S4.** 13C NMR spectrum of compound **1**

**Figure S5.** COSY spectrum of compound **1**

**Figure S6.** HMQC spectrum of compound **1**

**Figure S7.** HMBC spectrum of compound **1**
